# Supplementary material
Source: HighWire-hosted journal article supplement (https://erj.ersjournals.com/content/55/3/2000002)
Supplement: inline-supplementary-material-1 [file inline-supplementary-material-1.pdf]

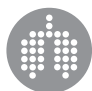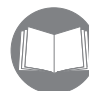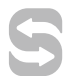

SHAREABLE PDF

# Treatable traits: a step closer to the “holy grail” of asthma control?

William W. Busse

**Affiliation:** Dept of Medicine, Division of Allergy, Pulmonary and Critical Care Medicine, University of Wisconsin School of Medicine and Public Health, Madison, WI, USA.

**Correspondence:** William W. Busse, University of Wisconsin Hospital, K4/910 CSC, MC 9988, 600 Highland Avenue, Madison, WI 53792, USA. E-mail: [wwb@medicine.wisc.edu](mailto:wwb@medicine.wisc.edu)

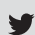

@ERSpublications

McDonald and colleagues are the first to demonstrate in a clinical trial that treatment of treatable traits in severe asthma improved disease control compared to guideline-directed care <http://bit.ly/2QXZG6v>

**Cite this article as:** Busse WW. Treatable traits: a step closer to the “holy grail” of asthma control? *Eur Respir J* 2020; 55: 2000002 [<https://doi.org/10.1183/13993003.00002-2020>].

This single-page version can be shared freely online.

Gaining optimal disease control remains a major unmet need for many patients with asthma [1]. Although progress in disease control has occurred with modifications to current guidelines and with newly available biologics, this unmet need is particularly problematic in severe asthma [2].
